# Supplementary material for: Preexisting memory CD4 T cells in naïve individuals confer robust immunity upon hepatitis B vaccination
Source: eLife. 2022 Jan 25;11:e68388. doi: 10.7554/eLife.68388 (PMC8824481; doi:10.7554/eLife.68388)
Supplement: Figure 2—source data 2. — Frequency of unique HBsAg-specific TCRβ sequences out of unique total TCRβ sequences in the memory CD4 T cell repertoire at two time points, day 0 and day 60. [file elife-68388-fig2-data2.csv]

Vaccinee	Status	Time_Point	percent_unique_HBsAg_specific_TCR
2	Late-converter	0	2.7412593802469417e-4
2	Late-converter	60	3.512304774392957e-4
3	Late-converter	0	1.5295197308045274e-4
3	Late-converter	60	2.1970778864110734e-4
4	Late-converter	0	5.97712391664629e-4
4	Late-converter	60	7.5753324729252e-4
6	Late-converter	0	3.4094783498124785e-4
6	Late-converter	60	2.592016588906169e-4
7	Early-converter	0	1.2531328320802005e-4
7	Early-converter	60	1.3278057272687036e-4
8	Early-converter	0	1.3631716460297627e-4
8	Early-converter	60	1.3159914899216985e-4
10	Early-converter	0	2.8113578858588697e-5
10	Early-converter	60	1.2091411067671598e-4
11	Early-converter	0	4.1883467306731963e-4
11	Early-converter	60	6.024798849457768e-4
13	Early-converter	0	1.4703720041170417e-4
13	Early-converter	60	3.893591901328845e-4
14	Late-converter	0	8.934611408222395e-5
14	Late-converter	60	9.498738024805276e-5
17	Early-converter	0	1.074592038808124e-4
17	Early-converter	60	5.31969660569036e-4
18	Early-converter	0	5.5156183927488005e-5
18	Early-converter	60	1.009224310195184e-4
19	Early-converter	0	1.7798978338643362e-5
19	Early-converter	60	1.6484784543866013e-5
20	Early-converter	0	3.0010803889400184e-4
20	Early-converter	60	2.948419993756287e-4
21	Non-converter	0	6.850605422254191e-5
21	Non-converter	60	1.184787330674144e-4
22	Early-converter	0	3.5741091532935415e-5
22	Early-converter	60	9.670378249937833e-5
23	Late-converter	0	1.209848164055411e-4
23	Late-converter	60	1.383652149849528e-4
24	Late-converter	0	4.5227326826945965e-4
24	Late-converter	60	4.834268659226097e-4
25	Non-converter	0	1.0176218178117738e-4
25	Non-converter	60	1.4518265793151007e-4
26	Late-converter	0	4.5611074368856756e-4
26	Late-converter	60	4.68760463403201e-4
28	Early-converter	0	0
28	Early-converter	60	2.4253007372914242e-4
29	Early-converter	0	1.207535018515537e-4
29	Early-converter	60	1.2669453946534905e-4
30	Late-converter	0	1.7611059745520187e-4
30	Late-converter	60	3.415844966183135e-4
31	Early-converter	0	2.7092364121373793e-4
31	Early-converter	60	3.790372453966924e-4
32	Early-converter	0	3.2197579499611734e-4
32	Early-converter	60	5.134281200631912e-4
33	Early-converter	0	1.7328353036312526e-4
33	Early-converter	60	2.093108440459786e-4
34	Early-converter	0	7.107657316148597e-5
34	Early-converter	60	1.719437007197072e-4
35	Early-converter	0	4.105511649389305e-5
35	Early-converter	60	3.476941555773303e-4
36	Early-converter	0	1.0563566259969366e-4
36	Early-converter	60	2.492296537973536e-4
38	Early-converter	0	1.597986536963426e-4
38	Early-converter	60	3.5927426598271494e-4
39	Early-converter	0	2.011718258857847e-4
39	Early-converter	60	4.5931256219857613e-4
40	Early-converter	0	3.568242640499554e-4
40	Early-converter	60	5.679052409540809e-4
41	Non-converter	0	4.257402558698938e-5
41	Non-converter	60	9.764671418806757e-5
