# Supplementary material for: Preexisting memory CD4 T cells in naïve individuals confer robust immunity upon hepatitis B vaccination
Source: eLife. 2022 Jan 25;11:e68388. doi: 10.7554/eLife.68388 (PMC8824481; doi:10.7554/eLife.68388)
Supplement: Figure 3—source data 1. — Frequency of predicted HBsAg epitope-specific and bystander T cell receptor β (TCRβ) sequences; and HBsAg-predictive ratio, Rhbs, calculated on the memory CD4 TCRβ repertoires at two time points, day 0 and day 60. [file elife-68388-fig3-data1.csv]

Vaccinee	Status	percent_predicted_bystander_TCR_day0	percent_predicted_HBsAg_specific_TCR_day0	percent_predicted_bystander_TCR_day60	percent_predicted_HBsAg_specific_TCR_day60	HBsAg_predictive_ratio_day0	HBsAg_predictive_ratio_day60
2	Late-converter	6.416805665372055e-7	5.177832106745819e-7	6.880919753924549e-7	4.717669273865623e-7	0.8069173942243116	0.6856160865958203
3	Late-converter	5.68667592222196e-7	4.542003654950341e-7	5.311616868246551e-7	4.993131872212793e-7	0.7987097765148606	0.9400399155410291
4	Late-converter	6.323214524980206e-7	5.36167405246057e-7	7.18288571693623e-7	6.263080875562731e-7	0.8479348646608433	0.8719449427958001
6	Late-converter	5.860837223145516e-7	4.77305273279507e-7	4.068187471377395e-7	4.94817038925772e-7	0.8143977645284899	1.2163083496204719
7	Early-converter	5.221386800334169e-7	5.330735215000853e-7	4.875404171005776e-7	4.875959077012036e-7	1.0209424083769636	1.0001138174368311
8	Early-converter	4.5700198861151045e-7	6.208328901892217e-7	5.3572450499686e-7	5.565351128491243e-7	1.3584905660377358	1.0388457269700333
10	Early-converter	4.84716876872219e-7	4.621151841901531e-7	6.514768894219611e-7	4.93499389433091e-7	0.9533713518953372	0.7575086659957508
11	Early-converter	5.554836512829173e-7	5.791663777455042e-7	5.863958835679141e-7	5.81251826228311e-7	1.0426344257079223	0.9912276714694787
13	Early-converter	5.413546351364826e-7	5.071913943242095e-7	4.150566079466233e-7	4.4562325181585703e-7	0.936893048299734	1.0736445180826144
14	Late-converter	3.912968499951414e-7	4.3452725816090007e-7	4.160031251739537e-7	4.619630783392412e-7	1.110479826674545	1.110479826674545
17	Early-converter	5.183274407223093e-7	5.938902685220451e-7	6.163905039963801e-7	5.076685170496064e-7	1.145782032482085	0.8236150845253577
18	Early-converter	5.943554302531035e-7	5.987580630697931e-7	5.800139713765425e-7	4.96234175511042e-7	1.0074074074074073	0.8555555555555556
19	Early-converter	6.009712513766077e-7	5.182491266508905e-7	3.671180465947172e-7	4.479850862778211e-7	0.86235260915354806	1.2202753049957733
20	Early-converter	4.743086821600604e-7	4.5837734240021793e-7	4.3608307886016754e-7	4.7010853496484273e-7	0.9664114523746663	1.078025169409487
21	Non-converter	3.952272358992803e-7	5.765926230397278e-7	3.6454994789973665e-7	5.331542988033648e-7	1.4588888888888887	1.4625
22	Early-converter	4.6216928706382004e-7	5.070062394694377e-7	3.8705331665391576e-7	4.4038336217213144e-7	1.0970141323982574	1.1377847527034648
23	Late-converter	8.500104197110616e-7	5.456789399734457e-7	7.965991104715275e-7	4.903406458873971e-7	0.6419673539518901	0.6155425476148872
24	Late-converter	8.606009558163808e-7	4.771374298939324e-7	8.084061303053674e-7	4.948690406323662e-7	0.554423541676539	0.6121539930003181
25	Non-converter	8.512425852417881e-7	5.180384691373968e-7	8.418386058766268e-7	4.907940631633135e-7	0.6085673791687155	0.5830025609864231
26	Late-converter	1.1517948072943626e-6	4.842730862423537e-7	1.2487791232852506e-6	5.250502226945827e-7	0.42045083306109116	0.42045083306109116
28	Early-converter	5.289508396112242e-7	3.9248377864542854e-7	5.749635368578807e-7	4.360276088074813e-7	0.742004264392324	0.758356975453312
29	Early-converter	5.060311978932446e-7	5.086829306773163e-7	5.764358835827662e-7	4.3791588495259987e-7	1.0052402555318951	0.7596957396732271
30	Late-converter	5.529375116332869e-7	5.498169469062498e-7	6.077379845642417e-7	5.468852011180171e-7	0.9943563880883765	0.8998700344691191
31	Early-converter	5.240012954509741e-7	5.90794616395874e-7	4.5860525758825454e-7	5.301912306455281e-7	1.127467854611724	1.156094968107725
32	Early-converter	5.714580539991941e-7	6.470874754501855e-7	5.532630604129215e-7	6.422392586457081e-7	1.1323446592828983	1.1608207823713736
33	Early-converter	4.4261438151500707e-7	4.738779394810873e-7	4.886927034119472e-7	5.410372457920329e-7	1.070633850303439	1.107111364697339
34	Early-converter	5.446480702029576e-7	5.481086884398288e-7	3.529222100158194e-7	4.722188866761032e-7	1.0063538611925709	1.3380254154447702
35	Early-converter	6.48859599759804e-7	5.561140060127742e-7	5.563288147625779e-7	5.244901524886613e-7	0.8570636948557706	0.9427700643413478
36	Early-converter	5.881295870313404e-7	6.032268270724864e-7	6.022398896618394e-7	5.708072200446307e-7	1.0256699210072926	0.9478070613441792
38	Early-converter	5.165904753114523e-7	5.062745364803481e-7	6.165706193030309e-7	5.847306281995032e-7	0.9800307219662059	0.9483595388643079
39	Early-converter	5.961449581744697e-7	6.559237883462168e-7	6.96594722363741e-7	5.823982783375055e-7	1.1002756617363727	0.8360647298062568
40	Early-converter	5.607421534549407e-7	5.504710544466457e-7	4.516898211611378e-7	4.6003950711042477e-7	0.9816830267797579	1.0184854419075082
41	Non-converter	5.36912785592596e-7	4.808711130569911e-7	6.760900092151068e-7	6.110039386038802e-7	0.8956223914955738	0.9037316485614291
