# Supplementary material for: Preexisting memory CD4 T cells in naïve individuals confer robust immunity upon hepatitis B vaccination
Source: eLife. 2022 Jan 25;11:e68388. doi: 10.7554/eLife.68388 (PMC8824481; doi:10.7554/eLife.68388)
Supplement: Figure 4—source data 1. — Numbers of vaccine-specific CD40L+4-1BB− and CD40L−4-1BB+ memory CD4 T cell out of 106 memory CD4 T cells and antibody titers at the four time points, days 0, 60, 180, and 365. [file elife-68388-fig4-data1.csv]

Vaccinee	Time_Point	Status	Antibody_titre	Antibody_titre_FC_365_0	CD137neg_CD154pos_memory_CD4_out_memory_CD4	CD137pos_CD154neg_memory_CD4_out_memory_CD4
2	0	Late-converter	2	3.936402377725063	332.1692198322072	0
2	60	Late-converter	2	3.936402377725063	0	0
2	180	Late-converter	40.7	3.936402377725063	207.5252545799048	0
2	365	Late-converter	16.31	3.936402377725063	0	0
3	0	Late-converter	2	3.9136075118230993	326.790845947954	435.16731323117307
3	60	Late-converter	3.62	3.9136075118230993	628.6513690293277	243.17655822295112
3	180	Late-converter	8.69	3.9136075118230993	0	0
3	365	Late-converter	16.07	3.9136075118230993	601.2497739551886	278.37920064491846
4	0	Late-converter	2	1.5509006646475232	293.7117159533216	140.41240066888653
4	60	Late-converter	6.77	1.5509006646475232	205.03134587020375	236.1519749311753
4	180	Late-converter	23.97	1.5509006646475232	0	0
4	365	Late-converter	3.93	1.5509006646475232	629.8573156664461	150.20892353777944
6	0	Late-converter	2	3.6403895600549454	0	171.7709874047821
6	60	Late-converter	4.12	3.6403895600549454	260.0147172410995	0
6	180	Late-converter	33.22	3.6403895600549454	313.96831275520094	0
6	365	Late-converter	13.47	3.6403895600549454	239.39710580396988	0
7	0	Early-converter	2	3.4802651220544627	0	0
7	60	Early-converter	40.89	3.4802651220544627	400.68839320917766	0
7	180	Early-converter	45.59	3.4802651220544627	0	133.74763195488146
7	365	Early-converter	12.16	3.4802651220544627	137.34182752731937	0
8	0	Early-converter	2	3.8698714061777126	606.1650643302262	0
8	60	Early-converter	19.38	3.8698714061777126	1319.0538208564717	253.60763850271616
8	180	Early-converter	40.03	3.8698714061777126	204.85393091992137	0
8	365	Early-converter	15.62	3.8698714061777126	619.1116841644191	395.91511817711495
10	0	Early-converter	2	6.0522419811811385	0	214.72475566557452
10	60	Early-converter	409.2	6.0522419811811385	1174.7968578056914	460.0708309492487
10	180	Early-converter	265.1	6.0522419811811385	592.7097291130398	166.08713906841666
10	365	Early-converter	67.36	6.0522419811811385	194.49819528263748	172.75076089347095
11	0	Early-converter	2	5.73633427697511	160.8566369985774	0
11	60	Early-converter	20.68	5.73633427697511	354.9697548832037	144.97149077263887
11	180	Early-converter	104.5	5.73633427697511	0	310.1316125247146
11	365	Early-converter	54.31	5.73633427697511	150.24505742259785	0
13	0	Early-converter	2	7.661778097771987	364.5073665643133	0
13	60	Early-converter	882.1	7.661778097771987	1015.1239351882928	458.2916548270291
13	180	Early-converter	841.4	7.661778097771987	758.2189636214492	775.5179787748045
13	365	Early-converter	203.5	7.661778097771987	494.11942787216793	755.2816523699964
14	0	Late-converter	2	4.762880292916999	427.8091749692301	0
14	60	Late-converter	2	4.762880292916999	343.18932048088266	0
14	180	Late-converter	87.41	4.762880292916999	656.6290382718756	207.9901551107242
14	365	Late-converter	28.15	4.762880292916999	0	0
17	0	Early-converter	2	7.266786540694901	0	175.54764964843093
17	60	Early-converter	372.7	7.266786540694901	652.1216416273236	632.0041768584791
17	180	Early-converter	568.9	7.266786540694901	209.7156110235983	213.1368221745975
17	365	Early-converter	155	7.266786540694901	480.8666867859658	170.17745273416134
18	0	Early-converter	2	5.050936965225225	411.1039587255877	0
18	60	Early-converter	18.85	5.050936965225225	1038.123762929452	591.4060317628539
18	180	Early-converter	59.45	5.050936965225225	0	0
18	365	Early-converter	34.15	5.050936965225225	0	0
19	0	Early-converter	2.18	6.773732650607855	543.0505901064348	0
19	60	Early-converter	963.2	6.773732650607855	318.28900546359546	212.79878784597187
19	180	Early-converter	337.4	6.773732650607855	777.7961675595645	0
19	365	Early-converter	110.6	6.773732650607855	316.3013745560491	0
20	0	Early-converter	2	4.529820946528695	662.230408272093	0
20	60	Early-converter	33.12	4.529820946528695	1040.051107515144	343.0192523639255
20	180	Early-converter	71.18	4.529820946528695	936.2876358917074	372.09530318303
20	365	Early-converter	24.1	4.529820946528695	234.0468242154853	154.85446979038954
21	0	Non-converter	2	0	768.2435347937453	0
21	60	Non-converter	2	0	209.6653056008957	245.17257127513415
21	180	Non-converter	4.47	0	0	0
21	365	Non-converter	2	0	0	0
22	0	Early-converter	2	9.604553229079038	0	0
22	60	Early-converter	361.1	9.604553229079038	1216.1267634647754	0
22	180	Early-converter	2067	9.604553229079038	0	0
22	365	Early-converter	779.5	9.604553229079038	353.7904823561905	249.99764917513815
23	0	Late-converter	2	2.9781956296816516	336.4238730351522	245.5265492341385
23	60	Late-converter	2	2.9781956296816516	572.9784060382898	168.39962496181963
23	180	Late-converter	26.37	2.9781956296816516	701.4837157860148	215.39735457572917
23	365	Late-converter	8.88	2.9781956296816516	299.2677584552964	316.1311938275351
24	0	Late-converter	2	3.1842802944193824	0	0
24	60	Late-converter	2	3.1842802944193824	646.5987454009512	0
24	180	Late-converter	24.02	3.1842802944193824	1218.1070756000536	0
24	365	Late-converter	10.09	3.1842802944193824	972.9875511387976	0
25	0	Non-converter	2	0	1271.7522582283243	0
25	60	Non-converter	2	0	707.1024410146107	0
25	180	Non-converter	2.54	0	0	0
25	365	Non-converter	2	0	1487.081158447085	501.05873949100857
26	0	Late-converter	2	2.4276061727818994	0	0
26	60	Late-converter	3.38	2.4276061727818994	0	0
26	180	Late-converter	14.88	2.4276061727818994	0	0
26	365	Late-converter	6.38	2.4276061727818994	0	0
28	0	Early-converter	2	9.964340867792416	0	0
28	60	Early-converter	32230	9.964340867792416	2646.748847959398	1330.4760211376572
28	180	Early-converter	6983	9.964340867792416	1715.8941890384372	586.8529197329013
28	365	Early-converter	1000	9.964340867792416	916.331048167096	694.0319533080067
29	0	Early-converter	2	4.46532151358055	650.6109116943867	0
29	60	Early-converter	12.28	4.46532151358055	824.5947931733936	278.4933594975456
29	180	Early-converter	45.62	4.46532151358055	575.6119204599244	351.21468961724116
29	365	Early-converter	23.09	4.46532151358055	873.0401832097886	562.8544537602986
30	0	Late-converter	2	4.38543103719352	0	0
30	60	Late-converter	3.32	4.38543103719352	774.3513327877168	173.7312096625025
30	180	Late-converter	28.2	4.38543103719352	205.5380798491252	0
30	365	Late-converter	21.9	4.38543103719352	0	0
31	0	Early-converter	2	5.342696959981934	0	0
31	60	Early-converter	53.23	5.342696959981934	1127.2444212044493	994.1375426202196
31	180	Early-converter	172.8	5.342696959981934	492.2901439471134	219.1166954017972
31	365	Early-converter	41.58	5.342696959981934	345.72077181282583	527.8657833777837
32	0	Early-converter	8.55	9.726643921483994	412.0473637058618	319.28582254049945
32	60	Early-converter	8894.5	9.726643921483994	808.4322394253842	1742.4353269512492
32	180	Early-converter	4147	9.726643921483994	661.9687649403324	668.5078298943915
32	365	Early-converter	854.8	9.726643921483994	683.8849495601297	678.3849638835798
33	0	Early-converter	2	5.859721128927965	212.71783163417084	133.33494715725
33	60	Early-converter	13.87	5.859721128927965	333.3941263887521	306.59120160973384
33	180	Early-converter	113.4	5.859721128927965	196.7707935026189	131.496469563546
33	365	Early-converter	59.07	5.859721128927965	130.72163087700406	137.65413728372087
34	0	Early-converter	2	6.701826258412055	493.67392617755223	0
34	60	Early-converter	886.5	6.701826258412055	909.1409468120736	680.6499656917637
34	180	Early-converter	291.9	6.701826258412055	211.93792307780663	331.04733481301275
34	365	Early-converter	105.1	6.701826258412055	1060.8947432125642	243.47839413532125
35	0	Early-converter	2	6.112700132749362	0	0
35	60	Early-converter	284.4	6.112700132749362	1061.5973880027962	1896.8283277064097
35	180	Early-converter	167.7	6.112700132749362	719.2370283925748	764.862678620737
35	365	Early-converter	70.2	6.112700132749362	697.2676982128563	1435.270095741571
36	0	Early-converter	2	5.930973825562906	0	0
36	60	Early-converter	82.23	5.930973825562906	329.11621032067694	684.3728482519608
36	180	Early-converter	159.6	5.930973825562906	0	0
36	365	Early-converter	62.01	5.930973825562906	189.2539824297852	289.11818986930643
38	0	Early-converter	2	5.414812060565847	356.2862879866618	0
38	60	Early-converter	62.71	5.414812060565847	462.4460322017713	329.4554520231117
38	180	Early-converter	128.4	5.414812060565847	271.74376004608087	299.3124190080704
38	365	Early-converter	43.66	5.414812060565847	0	0
39	0	Early-converter	2	2.956056652412403	0	0
39	60	Early-converter	11.28	2.956056652412403	752.0050844999919	504.1354862228857
39	180	Early-converter	22.18	2.956056652412403	646.7793293709333	643.4407701264918
39	365	Early-converter	8.76	2.956056652412403	375.98978745004615	476.7033322781144
40	0	Early-converter	2	9.37351771565002	202.32069009478272	0
40	60	Early-converter	105.3	9.37351771565002	1728.626618273748	1656.9027593142223
40	180	Early-converter	975	9.37351771565002	338.18890097914635	687.3862716389375
40	365	Early-converter	664.3	9.37351771565002	595.2809032848173	741.3015088415746
41	0	Non-converter	2	1.584962500721156	605.6596236620752	0
41	60	Non-converter	2	1.584962500721156	0	0
41	180	Non-converter	3.39	1.584962500721156	449.3959960978982	333.57074527806265
41	365	Non-converter	4	1.584962500721156	1021.8026322858052	270.15021351845724
42	0	Non-converter	2	0	173.35607668633972	152.12104267840738
42	60	Non-converter	3.27	0	304.31716080507505	0
42	180	Non-converter	6.94	0	168.6201837969892	0
42	365	Non-converter	2	0	0	311.3889712647625
