# Supplementary material for: Preexisting memory CD4 T cells in naïve individuals confer robust immunity upon hepatitis B vaccination
Source: eLife. 2022 Jan 25;11:e68388. doi: 10.7554/eLife.68388 (PMC8824481; doi:10.7554/eLife.68388)
Supplement: Figure 5—source data 1. — Frequency of 4-1BB+CD45RA− TREG within CD45RA− TREG CD4 T cells, and median fluorescence intensity of 4-1BB in TH, cTFH, TREG, and cTFR cells, and of 4-1BB and CD25 in CD45RA− TREG and CD45RA+ TREG cells before vaccination. [file elife-68388-fig5-data1.csv]

Vaccinee	Time_Point	Status	CD137pos_CD45RAneg_Treg_out_CD45RAneg_Treg_freq	TH_CD137_MFI	TFH_CD137_MFI	Treg_CD137_MFI	TFR_CD137_MFI	CD45RAneg_Treg_CD137_MFI	CD45RApos_Treg_CD137_MFI	CD45RAneg_Treg_CD25_MFI	CD45RApos_Treg_CD25_MFI
2	0	Late-converter	22.845473110959837	194	182	342	185	703	188	3941	3692
3	0	Late-converter	39.36737804878049	174	154	635	294	1457	274	4250	3326
4	0	Late-converter	22.41601427014171	185	122	536	245	724	179	4753	3334
6	0	Late-converter	37.00766049759338	179	128	653	217	1357	120	4471	3701
7	0	Early-converter	16.150081566068515	111	85.4	228	65.5	437	82.5	3941	3293
8	0	Early-converter	17.937417364477742	145	99.6	383	111	586	137	5120	3921
10	0	Early-converter	22.361037586024352	117	76.8	279	93.9	609	108	4669	3229
11	0	Early-converter	28.594979040082897	174	145	498	242	865	171	4693	3729
13	0	Early-converter	19.520371325425476	120	99.6	331	251	656	114	4283	3583
14	0	Late-converter	39.848448400288675	-11.4	14.2	627	248	1659	65.5	7727	4766
17	0	Early-converter	10.84091488818978	179	137	288	194	374	137	3574	3029
18	0	Early-converter	17.732813874575847	157	140	383	208	556	137	4790	3767
19	0	Early-converter	27.700546946216953	197	157	553	182	877	171	5133	4283
20	0	Early-converter	27.97540885758625	148	128	386	165	775	120	5720	3757
21	0	Non-converter	39.89542483660131	179	140	527	177	1564	159	4229	3213
22	0	Early-converter	36.62732546509302	162	154	409	297	1236	202	2630	2162
23	0	Late-converter	28.224882210620144	205	179	414	194	889	177	4889	3991
24	0	Late-converter	26.646441663506508	114	68.3	314	131	798	79.7	4494	3384
25	0	Non-converter	18.027558050523098	111	85.4	251	108	533	117	2781	2567
26	0	Late-converter	35.82270557859322	165	137	697	259	1216	159	5159	3334
28	0	Early-converter	20.368696909452375	191	174	386	248	565	162	2734	2429
29	0	Early-converter	29.409634190510687	197	159	665	191	1014	271	5120	3720
30	0	Late-converter	34.26406335335882	131	85.4	536	142	999	93.9	3951	2934
31	0	Early-converter	22.814103263835825	51.2	56.9	279	142	612	0	4426	3646
32	0	Early-converter	22.30516194331984	131	82.5	469	185	635	17.1	4186	3119
33	0	Early-converter	19.85486342738664	68.3	48.4	305	91.1	504	37	4449	3521
34	0	Early-converter	38.41059602649007	134	102	490	197	1474	271	4587	3513
35	0	Early-converter	26.06563364115407	82.5	59.8	420	125	727	96.8	4426	3478
36	0	Early-converter	21.68926716676284	79.7	19.9	197	154	591	59.8	4889	3150
38	0	Early-converter	24.505386875612142	145	120	423	159	730	131	4326	3513
39	0	Early-converter	27.55741127348643	114	114	391	274	880	105	3701	2788
40	0	Early-converter	19.87616748871865	154	151	274	225	495	120	3384	2592
41	0	Non-converter	16.974981046247155	105	93.9	257	140	423	108	4326	2856
42	0	Non-converter	14.80811351299876	131	88.2	277	234	429	99.6	2999	2208
