# Supplementary material for: Preexisting memory CD4 T cells in naïve individuals confer robust immunity upon hepatitis B vaccination
Source: eLife journal article supplement (doi:10.7554/elife.68388), 2022-01-10
Supplement: supp [file elife-68388-supp-v1.zip]

A

FSC-A

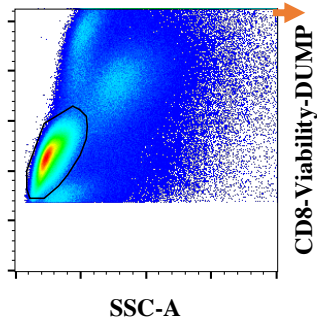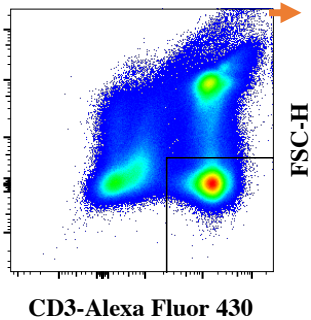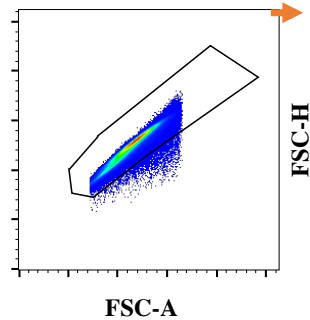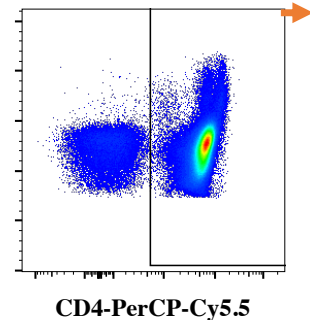

CXCR5-PE-Cy7

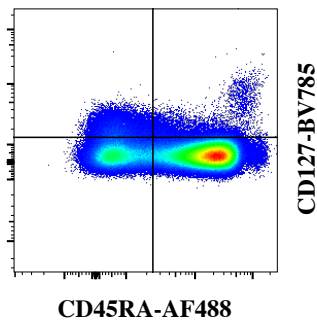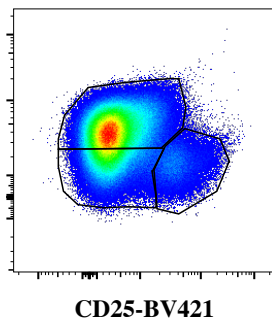

B

CD137-PE

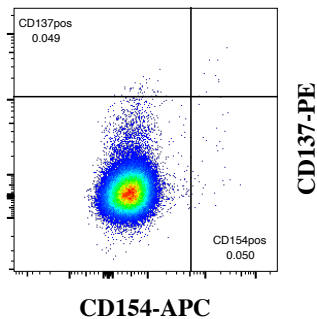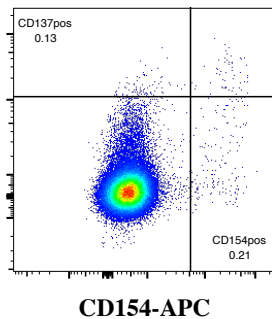

|                                      | CD45RA | CXCR5 | CD25 | CD127      |
|--------------------------------------|--------|-------|------|------------|
| Naive T <sub>H</sub>                 | +      | —     | —    | low + high |
| Memory T <sub>H</sub>                | —      | —     | —    | low + high |
| Naive T <sub>FH</sub>                | +      | +     | —    | low + high |
| Memory T <sub>FH</sub>               | —      | +     | —    | low + high |
| CD45RA <sup>+</sup> T <sub>REG</sub> | +      | —     | +    | low        |
| CD45RA <sup>−</sup> T <sub>REG</sub> | —      | —     | +    | low        |
| CD45RA <sup>+</sup> T <sub>FR</sub>  | +      | +     | +    | low        |
| CD45RA <sup>−</sup> T <sub>FR</sub>  | —      | +     | +    | low        |
