# Supplementary material for: Preexisting memory CD4 T cells in naïve individuals confer robust immunity upon hepatitis B vaccination
Source: eLife journal article supplement (doi:10.7554/elife.68388), 2022-01-10

**A**

### Vaccine-specific memory CD4 T cells over time for early, late and non-converters

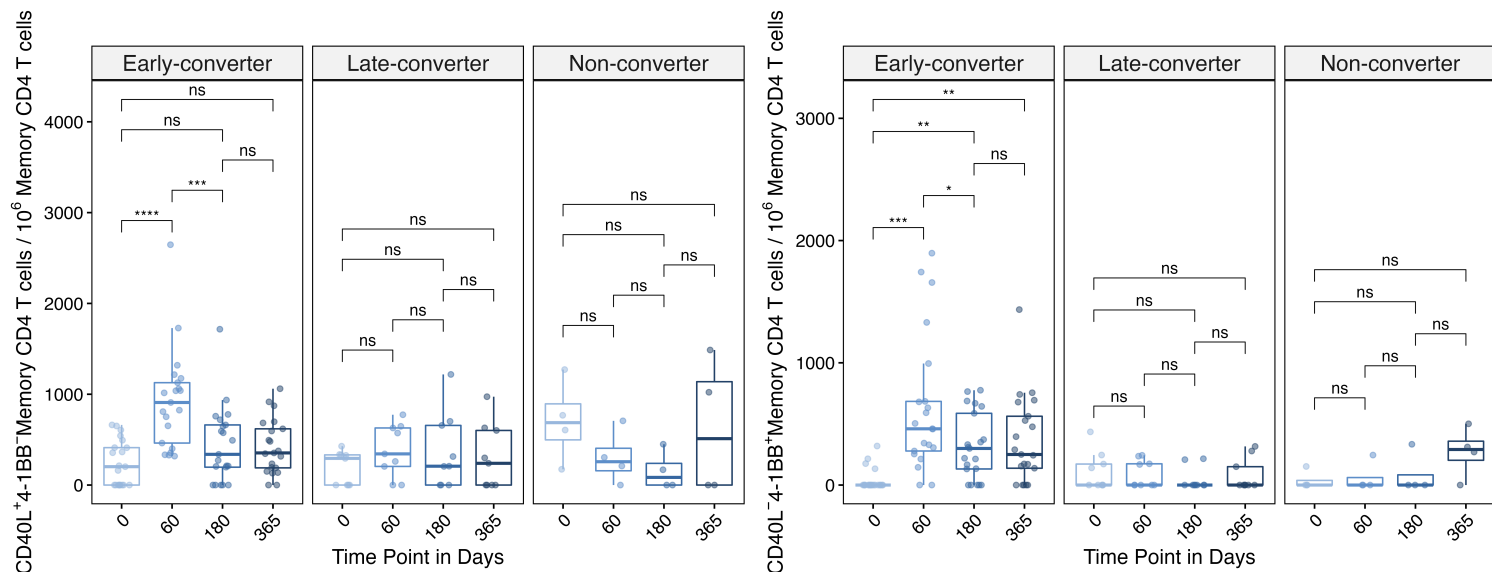**B**

### Vaccine-specific CD4 T cells over time for early, late and non-converters

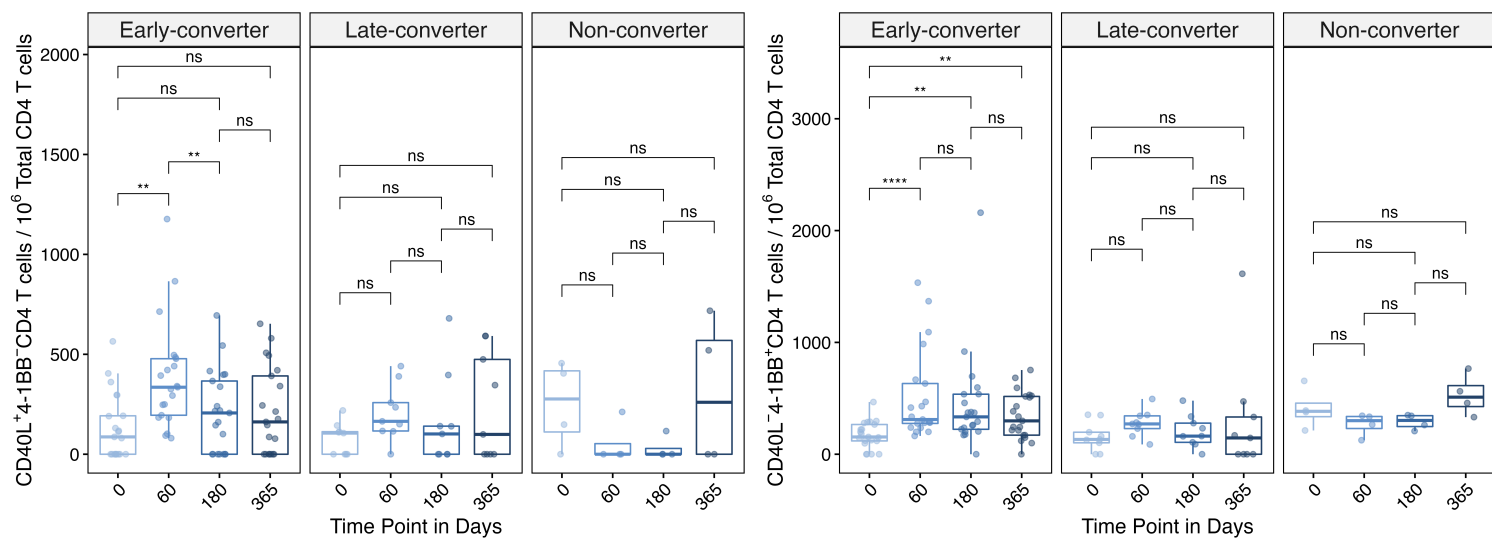

Supplement: supp [file elife-68388-supp-v1.zip]
