# Supplementary material for: Preexisting memory CD4 T cells in naïve individuals confer robust immunity upon hepatitis B vaccination
Source: eLife journal article supplement (doi:10.7554/elife.68388), 2022-01-10

**A****CD127-BV785**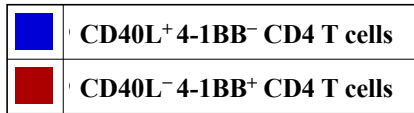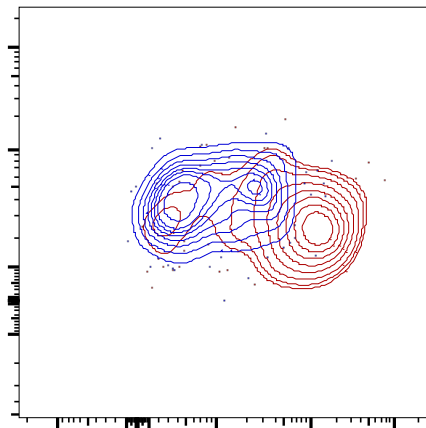**CD25-BV421****B**

**CD25 and CD127 expression on vaccine-specific CD4 T cells  
dissected by converse expression of CD40L and 4-1BB**

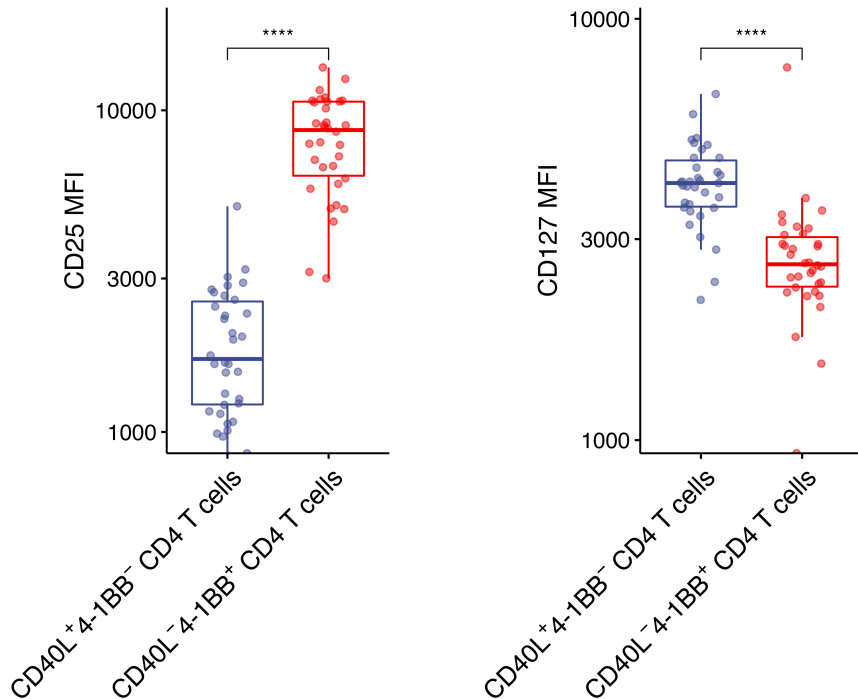

Supplement: supp [file elife-68388-supp-v1.zip]
