# Supplementary material for: Preexisting memory CD4 T cells in naïve individuals confer robust immunity upon hepatitis B vaccination
Source: eLife journal article supplement (doi:10.7554/elife.68388), 2022-01-10

### Correlation of vaccine-specific memory CD4 T cells at day 60 and antibody titer difference between day 365 and day 0

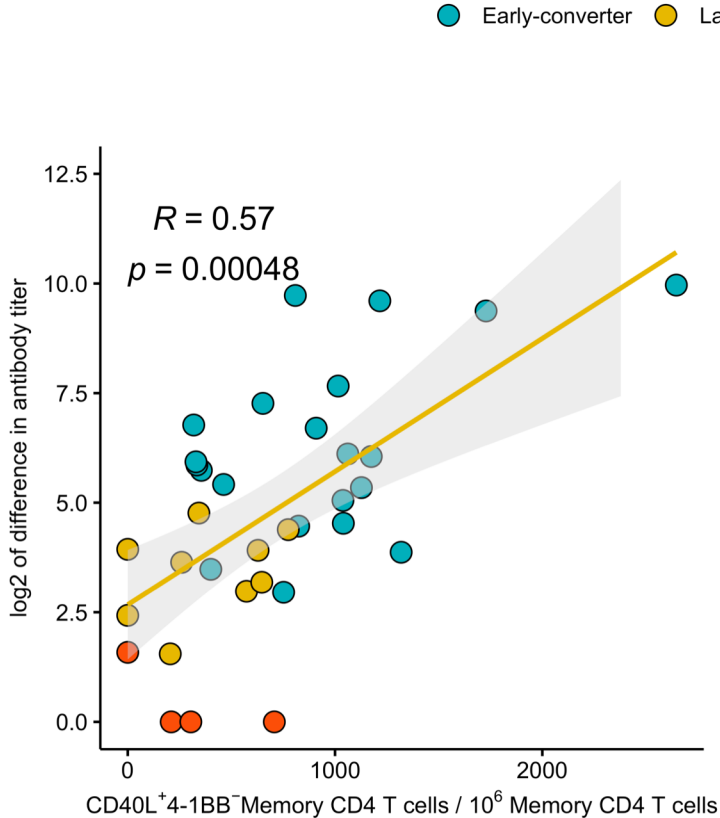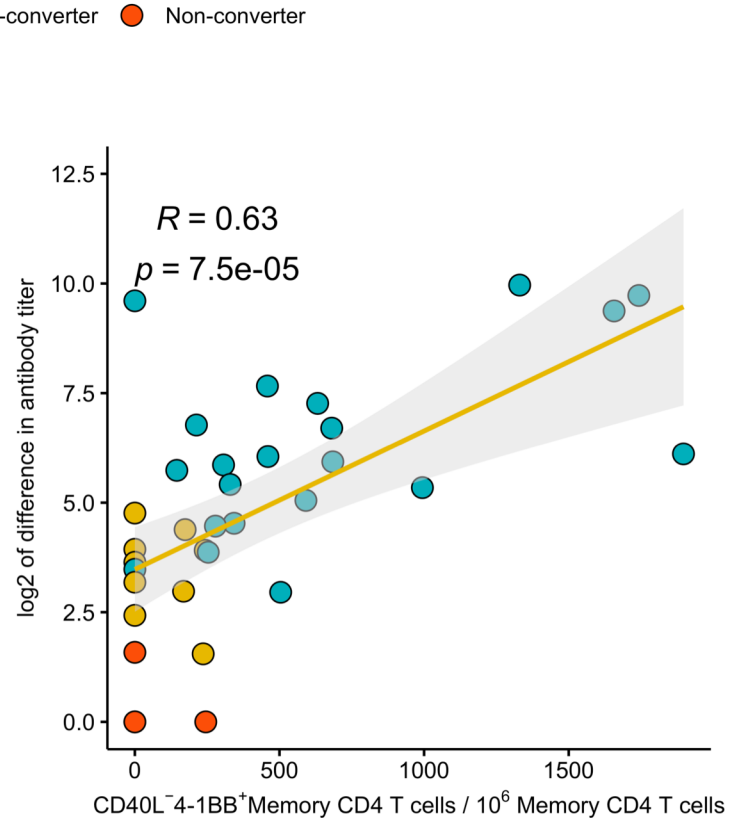

Supplement: supp [file elife-68388-supp-v1.zip]
