# Supplementary material for: Preexisting memory CD4 T cells in naïve individuals confer robust immunity upon hepatitis B vaccination
Source: eLife. 2022 Jan 25;11:e68388. doi: 10.7554/eLife.68388 (PMC8824481; doi:10.7554/eLife.68388)
Supplement: Supplementary file 1. [file elife-68388-supp1.xlsx]

## Sheet: Sequences of 54 peptides
Peptide No.	15 AA with 11 AA overlap	No. of AA at which the peptide starts
1	MENITSGFLGPLLVL	1
2	TSGFLGPLLVLQAGF	5
3	LGPLLVLQAGFFLLT	9
4	LVLQAGFFLLTRILT	13
5	AGFFLLTRILTIPQS	17
6	LLTRILTIPQSLDSW	21
7	ILTIPQSLDSWWTSL	25
8	PQSLDSWWTSLNFLG	29
9	DSWWTSLNFLGGSPV	33
10	TSLNFLGGSPVCLGQ	37
11	FLGGSPVCLGQNSQS	41
12	SPVCLGQNSQSPTSN	45
13	LGQNSQSPTSNHSPT	49
14	SQSPTSNHSPTSCPP	53
15	TSNHSPTSCPPICPG	57
16	SPTSCPPICPGYRWM	61
17	CPPICPGYRWMCLRR	65
18	CPGYRWMCLRRFIIF	69
19	RWMCLRRFIIFLFIL	73
20	LRRFIIFLFILLLCL	77
21	IIFLFILLLCLIFLL	81
22	FILLLCLIFLLVLLD	85
23	LCLIFLLVLLDYQGM	89
24	FLLVLLDYQGMLPVC	93
25	LLDYQGMLPVCPLIP	97
26	QGMLPVCPLIPGSTT	101
27	PVCPLIPGSTTTNTG	105
28	LIPGSTTTNTGPCKT	109
29	STTTNTGPCKTCTTP	113
30	NTGPCKTCTTPAQGN	117
31	CKTCTTPAQGNSMFP	121
32	TTPAQGNSMFPSCCC	125
33	QGNSMFPSCCCTKPT	129
34	MFPSCCCTKPTDGNC	133
35	CCCTKPTDGNCTCIP	137
36	KPTDGNCTCIPIPSS	141
37	GNCTCIPIPSSWAFA	145
38	CIPIPSSWAFAKYLW	149
39	PSSWAFAKYLWEWAS	153
40	AFAKYLWEWASVRFS	157
41	YLWEWASVRFSWLSL	161
42	WASVRFSWLSLLVPF	165
43	RFSWLSLLVPFVQWF	169
44	LSLLVPFVQWFVGLS	173
45	VPFVQWFVGLSPTVW	177
46	QWFVGLSPTVWLSAI	181
47	GLSPTVWLSAIWMMW	185
48	TVWLSAIWMMWYWGP	189
49	SAIWMMWYWGPSLYS	193
50	MMWYWGPSLYSIVSP	197
51	WGPSLYSIVSPFIPL	201
52	LYSIVSPFIPLLPIF	205
53	VSPFIPLLPIFFCLW	209
54	IPLLPIFFCLWVYI	213
