# Supplementary material for: Preexisting memory CD4 T cells in naïve individuals confer robust immunity upon hepatitis B vaccination
Source: eLife. 2022 Jan 25;11:e68388. doi: 10.7554/eLife.68388 (PMC8824481; doi:10.7554/eLife.68388)
Supplement: Supplementary file 2. [file elife-68388-supp2.xlsx]

## Sheet: single peptides 
Vaccinee	Gender	Age	Status	number of peptides	single peptides
2	F	43.6	Late-converter	6	51, 35, 50, 34, 54, 38
3	F	48.5	Late-converter	6	53, 5, 37, 49, 1, 33
4	M	47.1	Late-converter	6	21, 20, 5, 53, 4, 52
6	F	44.3	Late-converter	6	23, 39, 7, 21, 37, 5
7	M	38.3	Early-converter	2	17, 33
8	M	43.4	Early-converter	3	47, 41, 42
10	F	33.2	Early-converter	5	49, 1, 33, 41, 9
11	F	39	Early-converter	6	53, 50, 5, 2, 8, 21
13	F	45.9	Early-converter	3	24, 8, 16
14	M	36.3	Late-converter	2	45, 47
17	F	26.5	Early-converter	6	10, 42, 9, 41, 14, 46
18	M	43.3	Early-converter	4	6, 38, 5, 37
19	M	41.3	Early-converter	3	40, 16, 8
20	F	48.7	Early-converter	2	6, 1
21	F	27.2	Non-converter	6	2, 1, 3, 42, 41, 43
22	F	22.3	Early-converter	4	10, 13, 12, 16
23	F	43.9	Late-converter	6	51, 54, 48, 43, 47, 46
24	F	47.7	Late-converter	6	22, 24, 23, 20, 18, 46
25	F	22.6	Non-converter	6	29, 30, 28, 21, 22, 20
26	F	41.2	Late-converter	6	23, 47, 17, 41, 7, 49
28	F	41.7	Early-converter	6	54, 38, 52, 36, 40, 39
29	M	39.5	Early-converter	6	7, 47, 6, 1, 23, 46
30	F	45.1	Late-converter	6	22, 46, 54, 19, 20, 43
31	M	32.4	Early-converter	6	54, 38, 49, 33, 53, 37
32	F	31.4	Early-converter	6	7, 4, 1, 6, 31, 28
33	F	41	Early-converter	6	1, 41, 7, 5, 47, 45
34	M	22.5	Early-converter	5	7, 4, 5, 2, 6
35	F	50.2	Early-converter	6	46, 45, 47, 22, 21, 23
36	F	23.2	Early-converter	6	54, 47, 46, 39, 48, 38
38	F	23.2	Early-converter	6	37, 34, 33, 35, 5, 2
39	M	45.8	Early-converter	6	51, 50, 53, 49, 35, 34
40	F	21.3	Early-converter	5	33, 38, 37, 39, 40
41	M	21.6	Non-converter	6	23, 22, 7, 6, 17, 1
42	M	22.7	Non-converter	4	1, 33, 25, 41
