# Supplementary figures and images for: Preexisting memory CD4 T cells in naïve individuals confer robust immunity upon hepatitis B vaccination
Source: eLife journal article supplement (doi:10.7554/elife.68388), 2022-01-10

# In vitro expansion of CD4 T cells (7 days)

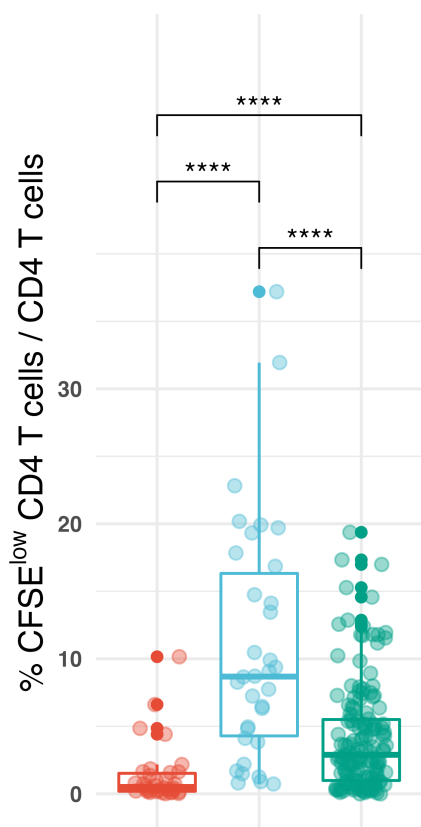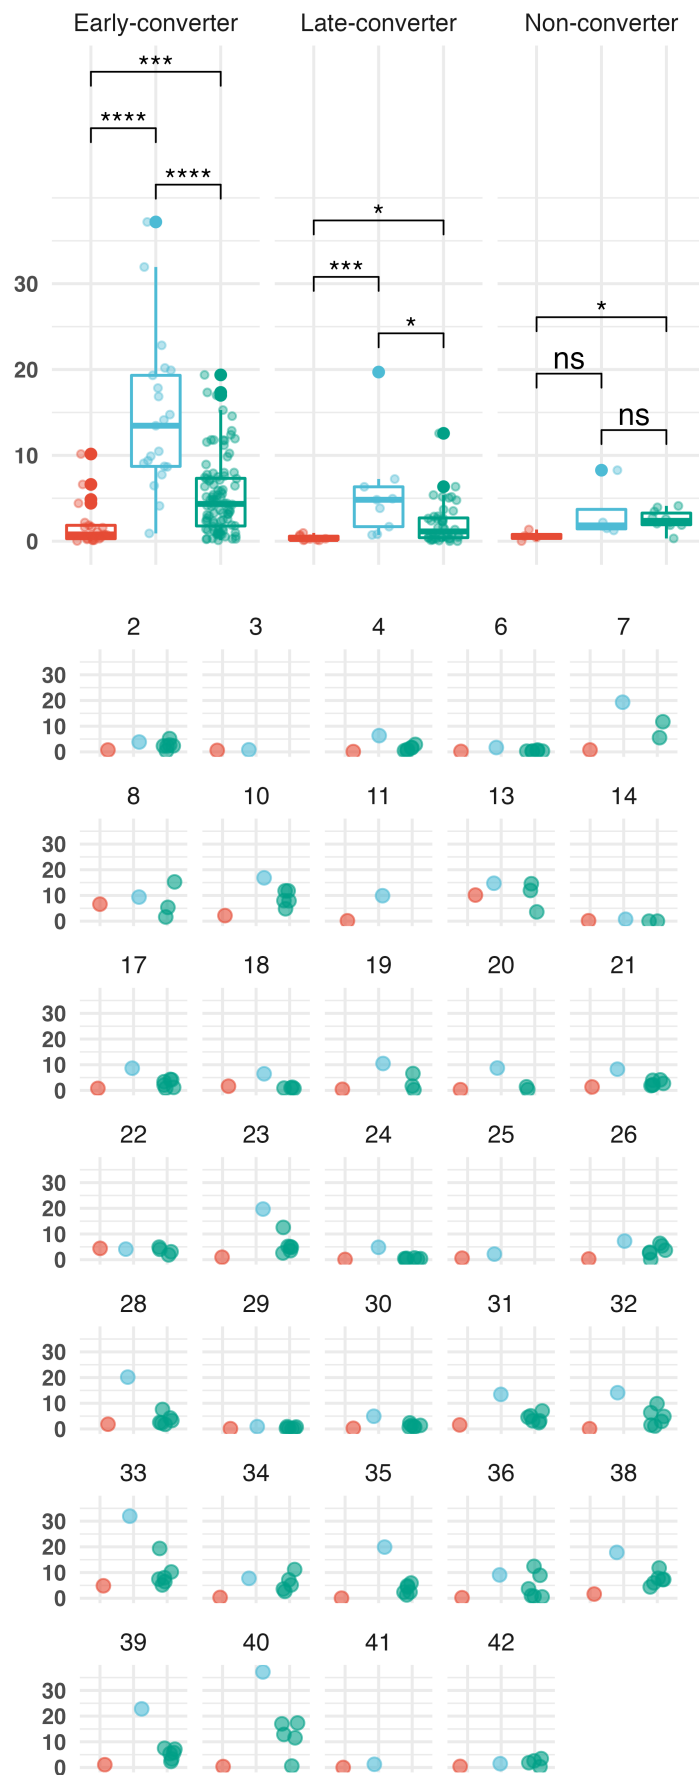

Supplement: supp [file elife-68388-supp-v1.zip]

**A**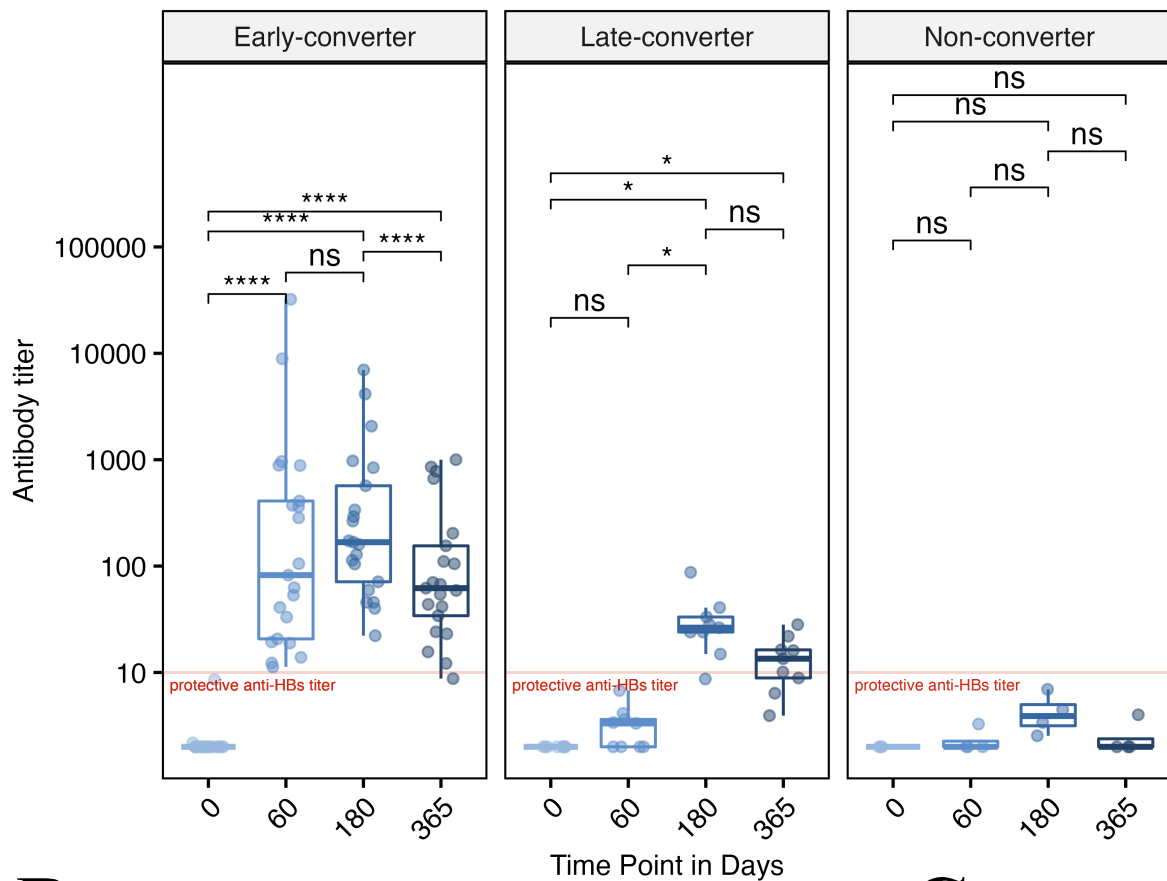**B**

### CMV, EBV and HSV seropositivity in the cohort

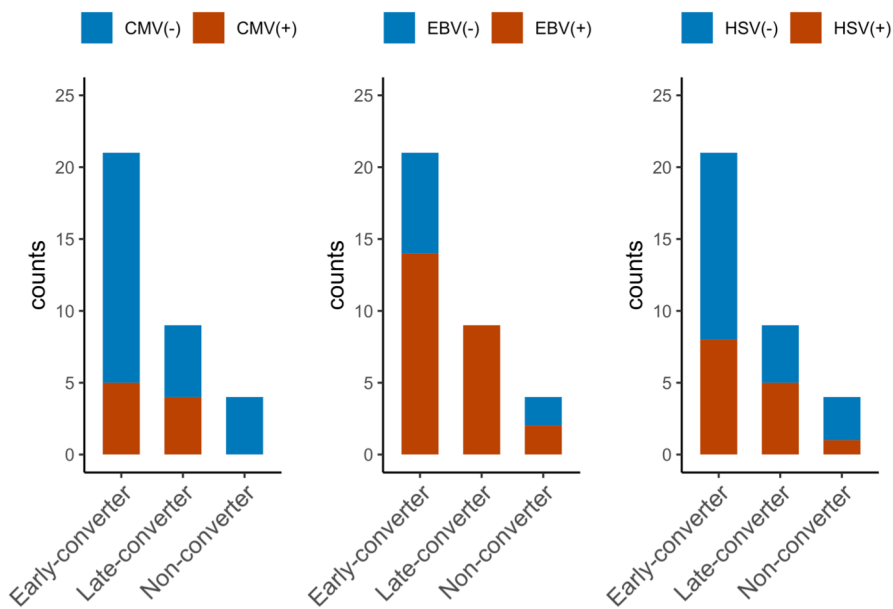**C**

### Age per group

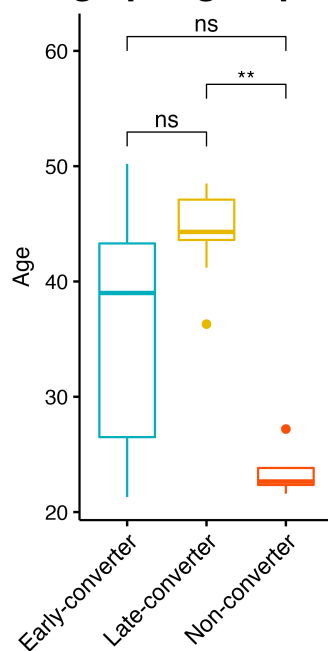

Supplement: supp [file elife-68388-supp-v1.zip]

**A**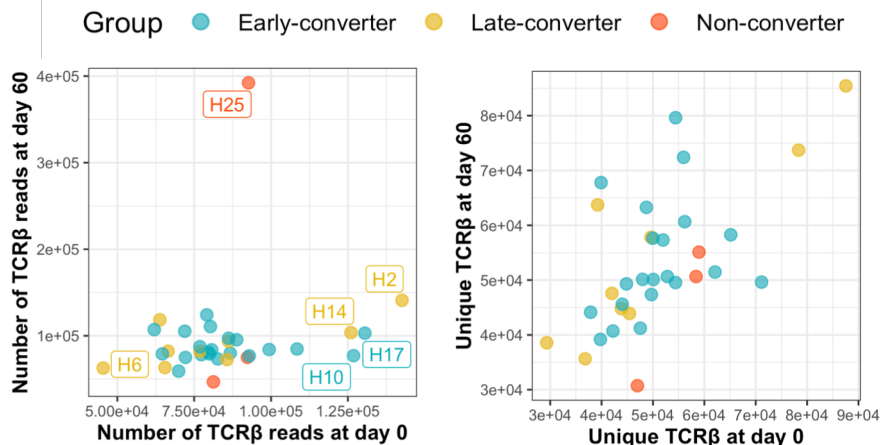**B**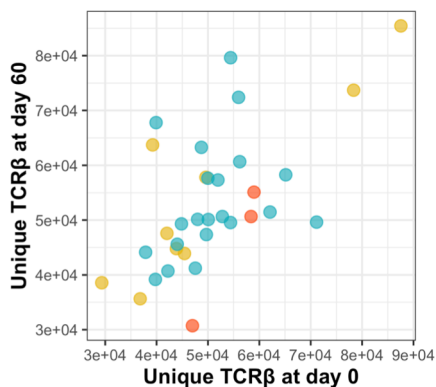**C**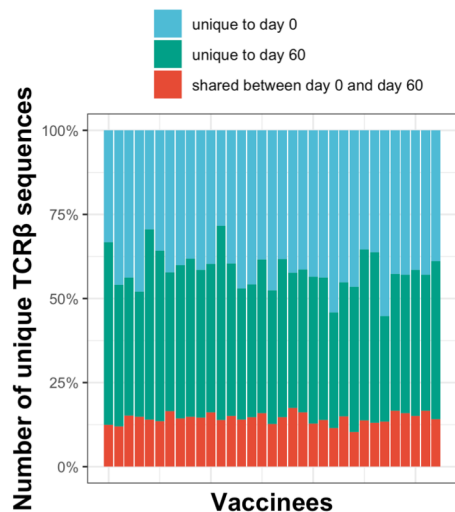**D**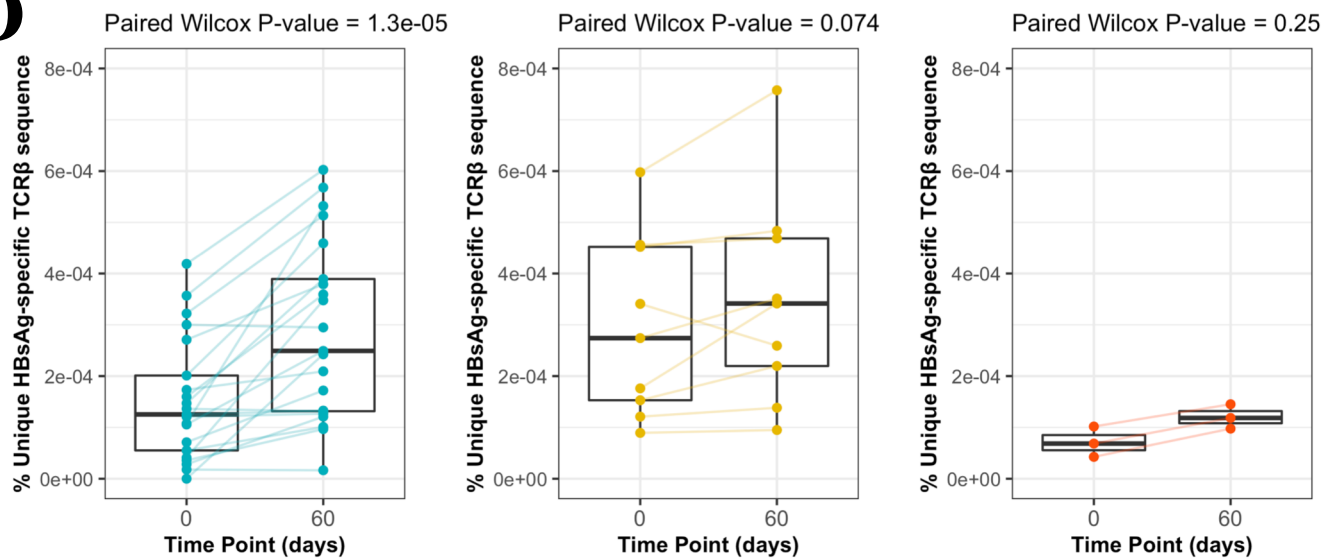**E**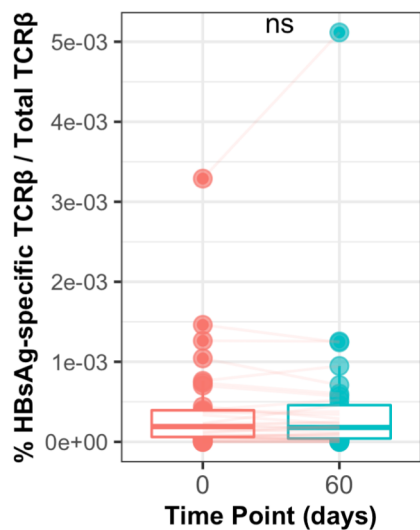

Supplement: supp [file elife-68388-supp-v1.zip]

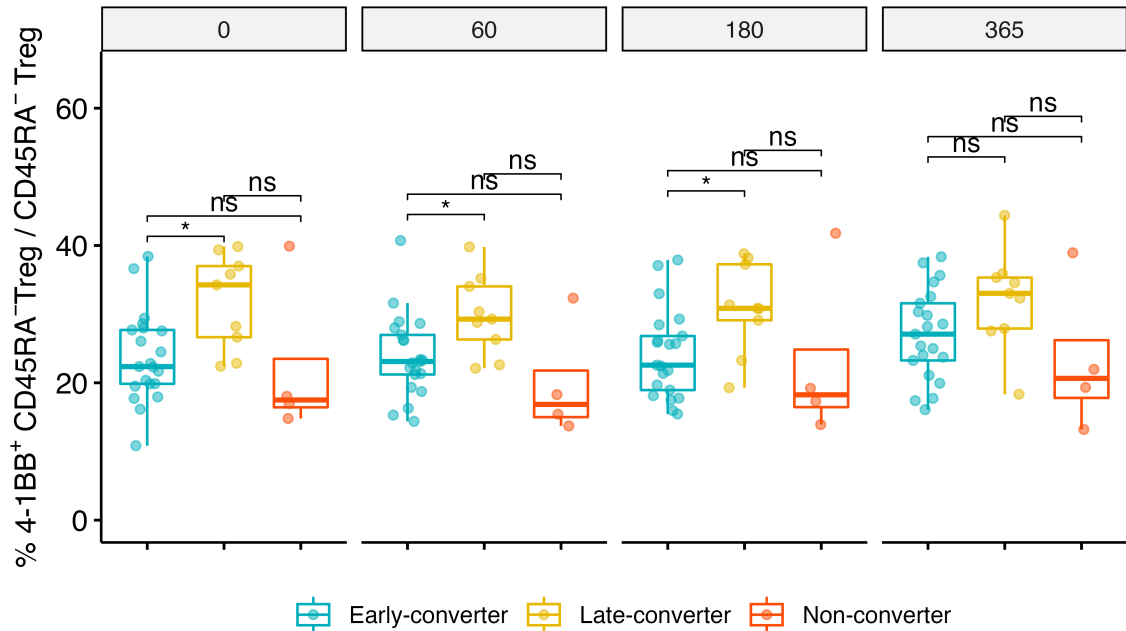

Supplement: supp [file elife-68388-supp-v1.zip]
